# Supplementary material for: Correlation of Systolic Blood Pressure With the Improvement of Acute Coronary Syndrome Patients Admitted in the Emergency Department: A Retrospective Cohort Study
Source: Research Square preprint supplement (doi:10.21203/rs.3.rs-279314/v1), 2021-03-16
Supplement: Supplementary file 1 [file 5cbe946e2039802cf687aec1.docx]

Table 1. Clinical characteristics of improvement and non-improvement patients in the emergency department

| Parameter |  | Improved in the emergency department (n=592) | Not improved in the emergency department (n=2075) | Total (n=2667) | *P* value |
| --- | --- | --- | --- | --- | --- |
| Age | Median (IQR) | 67 (56,76) | 65 (56,73) | 65 (56,74) | 0.038 |
| Breath rate | Median (IQR) | 20 (19,20) | 20 (19,20) | 20 (19,20) | 0.001 |
| Pulse rate | Median (IQR) | 79 (70,88) | 79 (69,89) | 79 (70,89) | 0.675 |
| SBP | Median (IQR) | 143 (124,163) | 134 (120,150) | 135 (121,153) | <0.001 |
| DBP | Median (IQR) | 81 (72,89) | 79 (70,89) | 80 (71,89) | 0.053 |
| cTnI | Median (IQR) | 0.01 (0.01,0.034) | 0.11 (0.01,1.3) | 0.049 (0.01,0.836) | <0.001 |
| Gender | Female | 237 (40.03%) | 598 (28.82%) | 835 (31.31%) | <0.001 |
|  | Male | 355 (59.97%) | 1477 (71.18%) | 1832 (68.69%) |  |
| Aspirin | No | 18 (3.04%) | 102 (4.92%) | 120 (4.5%) | 0.052 |
|  | Yes | 574 (96.96%) | 1973 (95.08%) | 2547 (95.5%) |  |
| Clopidogrel | No | 564 (95.27%) | 1812 (87.33%) | 2376 (89.09%) | <0.001 |
|  | Yes | 28 (4.73%) | 263 (12.67%) | 291 (10.91%) |  |
| Ticagrelor | No | 49 (8.28%) | 375 (18.07%) | 424 (15.9%) | <0.001 |
|  | Yes | 543 (91.72%) | 1700 (81.93%) | 2243 (84.1%) |  |
| Statins | No | 58 (9.8%) | 366 (17.64%) | 424 (15.9%) | <0.001 |
|  | Yes | 534 (90.2%) | 1709 (82.36%) | 2243 (84.1%) |  |
| Beta blockers | No | 587 (99.16%) | 2041 (98.36%) | 2628 (98.54%) | 0.156 |
|  | Yes | 5 (0.84%) | 34 (1.64%) | 39 (1.46%) |  |
| ACS category | STEMI | 32 (5.41%) | 809 (38.99%) | 841 (31.53%) | <0.001 |
|  | NSTEMI | 62 (10.47%) | 630 (30.36%) | 692 (25.95%) |  |
|  | UA | 498 (84.12%) | 636 (30.65%) | 1134 (42.52%) |  |

Note: SBP: systolic blood pressure; DBP: diastolic blood pressure; cTnI: Cardiac troponin I; ACS: acute coronary syndrome
